# Supplementary material
Source: Springer Nature journal article supplement (https://static-content.springer.com/esm/art:10.1186/10.1186/2191-5059-2-2/MediaObjects/13616_2011_3_MOESM1_ESM.pdf)

■ Cantonese   ■ English   ■ Putonghua

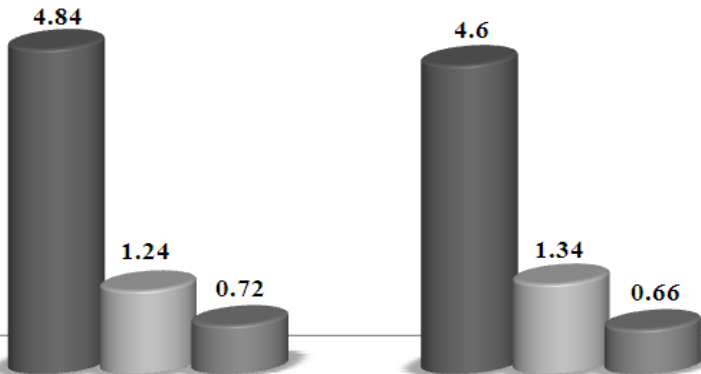

**non-workplace**

**workplace**

Supplement: MOESM1 [file 13616_2011_3_MOESM1_ESM.pdf]
